# Supplementary material for: Aggregation-induced ratiometric emission and mechanochromic luminescence in a pyrene-benzohydrazonate conjugate
Source: Royal Society of Chemistry journal article supplement (doi:10.1039/c8nj01379a), 2018-01-01
Supplement: c8nj01379a1.pdf [file c8nj01379a1.pdf]

## *Electronic Supporting Information (ESI) for*

# **Aggregation-induced ratiometric emission and mechanochromic luminescence in pyrene-benzohydrazone conjugate**

Yao Li, Wei Huang, Juan Yong, Shuaidan Huang, Yujie Li, Yang Liu and Dayu Wu\*

## **Table of Content**

Experimental Sections

**Figure S1.** <sup>1</sup>H NMR spectrums of **1-3** in DMSO-*d*<sup>6</sup>.

**Figure S2.** The crystal structure of complex **ph-ph**.

**Figure S3.** UV-vis spectras of pyrenyl-containing carbohydrozone derivatives **1-3**.

**Figure S4.** PL spectras of pyrenyl-containing carbohydrozone derivative **1** in DMF/H<sub>2</sub>O mixtures with different volume fractions of H<sub>2</sub>O.

**Figure S5-S7.** Scan-rate dependent cyclic voltammogram of complex **1-3** in the different media.

**Figure S8.** PL spectra of **3** in DMF/MeCN (A), DMF/MeOH (B) and DMF/CH<sub>2</sub>Cl<sub>2</sub> mixtures with different volume fractions of cosolvent.  $\lambda_{\text{ex}} = 365 \text{ nm}$ ,  $C = 10 \mu\text{M}$ .

**Figure S9.** PL spectra of **3** in DMF/H<sub>2</sub>O mixtures with different water fractions.  $\lambda_{\text{ex}} = 365 \text{ nm}$ ,  $C = 100 \mu\text{M}$  (A) and  $C = 1 \mu\text{M}$  (B).

**Figure S10** PL spectra of **1-3** in solid state,  $\lambda_{\text{ex}} = 365 \text{ nm}$ .

**Figure. S11** Multistate emission spectra of compound **1** in diluted solution, pristine, ground and annealed solids and the photographs taken under 365 nm UV illumination

**Figure S12.** UV-vis spectras of pyrenyl-containing carbohydrozone derivatives in solid state.

**Figure S13.** Powder XRD pattern before and after grinding.

**Figure S14.** FT-IR spectra of compound **1-3** before and after grinding.

Reference

## General remarks

<sup>1</sup>H NMR spectra were obtained from a solution in deuterated DMSO using a Bruker-400 spectrometer (s, singlet; d, doublet; t, triplet; m, multiplet; dd, double doublet). Elemental analyses (C, H, and N) were conducted with a Perkin-Elmer 2400 analyzer. Solid-state UV-vis spectra were recorded on a SHIMADZU UV-3600 UV-vis-NIR spectrophotometer. Powder X-ray diffraction (PXRD) was recorded on a RINT 2000 vertical goniometer with Cu K $\alpha$  X-ray source (operated at 40 kV and 100 mA). Steady PL and photoluminescence excitation (PLE) spectra were recorded by an Edinburgh FS5 steady state fluorescence spectrophotometer equipped with a 450 W xenon lamp. The absolute emission quantum yields were measured using a Quantum Yield Measurement System from Edinburgh FS5 coupled with an integrating sphere as the sample chamber and a multichannel analyzer for signal detection.

## Materials and reagents

Unless otherwise noted, all reagents were obtained from commercial suppliers and used without further purification. The model complex **ph-ph** was synthesized and characterized according to the literature method.<sup>1</sup> The single crystals suitable for X-ray diffraction were obtained by standing MeOH solution of ph-ph after several days in the dark. IR (solid KBr pellet) 1638(s), 1552(m), 1400(s), 1287(m), 1142(m), 970(w), 912(w) and 693(m) cm<sup>-1</sup>.

## Synthesis of pyrenyl-containing carbohydrozone derivatives

**General procedure for the synthesis of pyrenyl-containing carbohydrozone derivatives.** A round flask with a magnetic stir bar was charged with pyrene-1-carbaldehyde (230.2 mg, 1.0 mmol), benzoyl hydrazine derivatives (1.0 mmol) and several drops of glacial acetic acid in methanol (10 mL). After stirring at 80 °C for 3 h, the crude product was obtained by filtration. The residue was recrystallized from DMF and was dried in vacuum to get the target compound.

**Benzoic acid pyren-1-ylmethylene-hydrazide (1).** Following the general procedure, benzoic acid hydrazide (136.1 mg, 1.0 mmol) was used. Yield: 87% <sup>1</sup>H NMR (400 MHz, DMSO)  $\delta$  12.07 (s, 1H), 9.54 (s, 1H), 8.84 (d,  $J$  = 9.4 Hz, 1H), 8.60 (d,  $J$  = 8.1 Hz, 1H), 8.39 (d,  $J$  = 7.6 Hz, 4H), 8.27 (q,  $J$  = 8.9 Hz, 2H), 8.14 (t,  $J$  = 7.6 Hz, 1H), 8.02 (d,  $J$  = 7.1 Hz, 2H), 7.71 – 7.52 (m, 3H). Anal. Calcd for C<sub>24</sub>H<sub>16</sub>N<sub>2</sub>O: H, 4.63; C, 82.74; N, 8.04. Found: H, 5.02; C, 83.19; N, 8.14.

**4-Chloro-benzoic acid pyren-1-ylmethylene-hydrazide (2).** Following the general procedure, 4-chloro-benzoic acid hydrazide (170.6 mg, 1.0 mmol) was used. Yield: 84% <sup>1</sup>H NMR (400 MHz,

DMSO)  $\delta$  12.13 (s, 1H), 9.52 (s, 1H), 8.84 (d,  $J = 9.4$  Hz, 1H), 8.59 (d,  $J = 8.1$  Hz, 1H), 8.47 – 8.34 (m, 4H), 8.27 (dd,  $J = 18.8, 8.9$  Hz, 3H), 8.15 (t,  $J = 7.6$  Hz, 1H), 8.04 (d,  $J = 8.5$  Hz, 2H), 7.69 (d,  $J = 8.5$  Hz, 2H). Anal. Calcd for  $C_{24}H_{15}N_2ClO$ : H, 3.95; C, 75.29; N, 7.32. Found: H, 4.01; C, 75.18; N, 7.44.

**4-Methoxy-benzoic acid pyren-1-ylmethylene-hydrazide (3).** Following the general procedure, 4-methoxy-benzoic acid hydrazide (166.1 mg, 1.0 mmol) was used. Yield: 86%  $^1H$  NMR (400 MHz, DMSO)  $\delta$  11.95 (s, 1H), 9.52 (s, 1H), 8.83 (d,  $J = 9.2$  Hz, 1H), 8.59 (d,  $J = 8.1$  Hz, 1H), 8.39 (d,  $J = 7.7$  Hz, 1H), 8.27 (q,  $J = 8.9$  Hz, 1H), 8.14 (t,  $J = 7.6$  Hz, 1H), 8.01 (d,  $J = 8.8$  Hz, 1H), 7.13 (d,  $J = 8.8$  Hz, 1H), 3.87 (s, 1H). Anal. Calcd for  $C_{25}H_{18}N_2O$ : H, 5.00; C, 82.85; N, 7.73. Found: H, 5.15; C, 83.17; N, 7.45.

**Crystal Structure Determination** The diffraction intensity data was collected on a Bruker APEX-2 CCD with graphite-monochromated Cu-K $\alpha$  radiation ( $\lambda = 1.54178\text{\AA}$ ). Data collection, data reduction and cell refinement were performed by using the Bruker Instrument Service v4.2.2 and SAINT V8.34A software.<sup>2,3</sup> Structures were solved by direct methods using the SHELXS program, and refinement was performed using SHELXL based on  $F^2$  through full-matrix least squares routine.<sup>4</sup> Absorption corrections were applied upon using multi-scan program SADABS.<sup>5</sup> Hydrogen atoms of organic ligands were generated geometrically by the riding mode and all the non-hydrogen atoms were refined anisotropically through full-matrix least-squares technique on  $F^2$  with the SHELXTL program package.<sup>6,7</sup> A summary of the crystallographic data and refinement parameters is shown in Table S1.

**Table S1.** Crystallographic data and structure refinement for complex **ph-ph**.

| Complex                                     | <b>ph-ph</b>                                     |
|---------------------------------------------|--------------------------------------------------|
| Formula                                     | C <sub>14</sub> H <sub>12</sub> N <sub>2</sub> O |
| <i>Mr</i> [g mol <sup>-1</sup> ]            | 224.26                                           |
| Crystal system                              | orthorhombic                                     |
| Space group                                 | <i>Pna</i> 21                                    |
| Crystal colour                              | white                                            |
| Crystal description                         | needle                                           |
| <i>a</i> [Å]                                | 8.7913(7)                                        |
| <i>b</i> [Å]                                | 10.4651(8)                                       |
| <i>c</i> [Å]                                | 13.1287(11)                                      |
| $\alpha$ [°]                                | 90                                               |
| $\beta$ [°]                                 | 90                                               |
| $\gamma$ [°]                                | 90                                               |
| <i>V</i> [Å <sup>3</sup> ]                  | 1207.86(17)                                      |
| <i>Z</i>                                    | 4                                                |
| $\rho_{\text{calcd}}$ [g cm <sup>-3</sup> ] | 1.233                                            |
| $\mu$ (Mo-K $\alpha$ ) [mm <sup>-1</sup> ]  | 0.634                                            |
| <i>F</i> (000)                              | 472                                              |
| $\theta$ range [°]                          | 1.696/24.998                                     |
| $R_1^a/wR_2^b(I > 2\sigma(I))$              | 0.0388/0.0984                                    |
| $R_1/wR_2(\text{all data})$                 | 0.0435/0.1027                                    |
| GOF <sup>c</sup> on $F^2$                   | 1.028                                            |

$$^a R_1 = \sum ||F_0| - |F_c|| / \sum |F_0|. \quad ^b wR_2 = \{ \sum [w(F_o^2 - F_c^2)^2] / \sum [w(F_o^2)^2] \}^{1/2}$$

$$^c \text{Goodness-of-fit} = [ \sum [w(F_o^2 - F_c^2)^2] / (N_{\text{obs}} - N_{\text{params}}) ]^{1/2}, \text{ based on the data } I > 2\sigma(I).$$

**Table S2.** Photophysical properties of compounds **1** to **3**.

| <b>Groups</b>    | $\lambda^{\text{abs}}_{\text{max}}/\text{nm}$ | $\lambda^{\text{ex}}/\text{nm}$ | $\lambda^{\text{em}}_{\text{max}}/\text{nm}$ |          |       |        | <b>Q.Y/%</b> |      |       |        |
|------------------|-----------------------------------------------|---------------------------------|----------------------------------------------|----------|-------|--------|--------------|------|-------|--------|
|                  |                                               |                                 | sol                                          | agg      | solid | ground | sol          | agg  | solid | ground |
| H ( <b>1</b> )   | 370                                           | 365                             | 413                                          | 446, 504 | 502   | 520    | 8.51         | 21.8 | 54.5  | 29.8   |
| Cl ( <b>2</b> )  | 371                                           | 365                             | 416                                          | 440, 547 | 468   | 532    | 17.1         | 36.2 | 4.81  | 7.16   |
| OMe ( <b>3</b> ) | 371                                           | 365                             | 412                                          | 444, 532 | 452   | 526    | 15.6         | 23.7 | 3.79  | 7.73   |

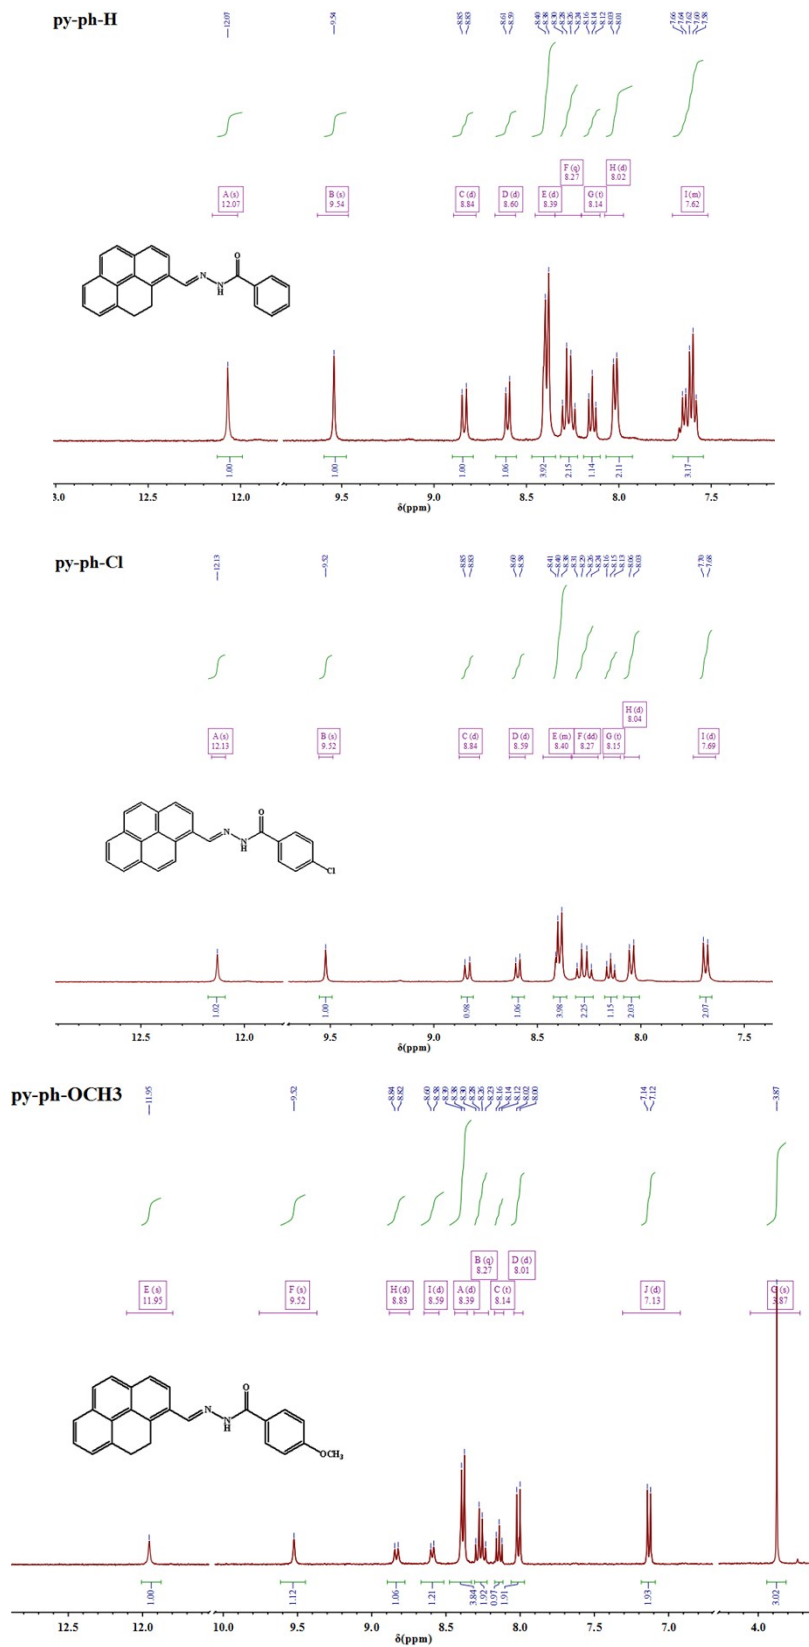

**Figure S1.**  $^1\text{H}$  NMR spectra of **1-3** in  $\text{DMSO-}d_6$ .

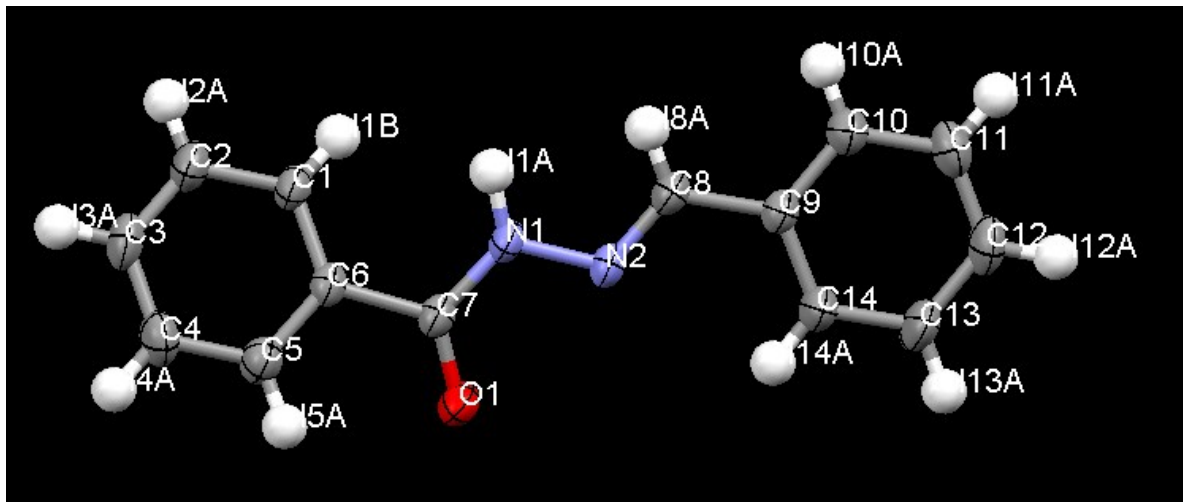

**Figure S2.** The ORTEP diagram of crystal structure, **ph-ph**.

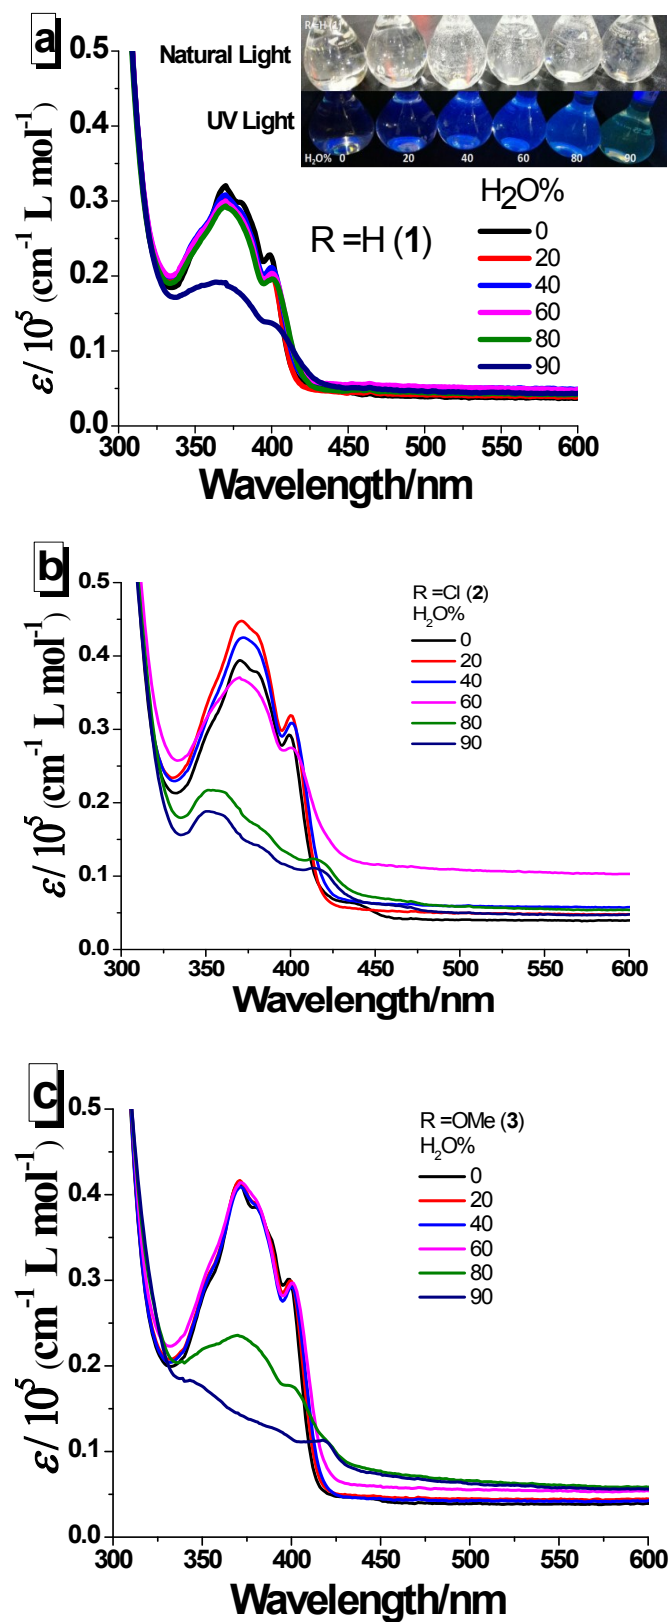

**Figure S3.** UV-vis spectras of pyrenyl-containing carbohydrozone derivatives **1-3** ( $10^{-5}$ mol/L) in aqueous DMF with the different water fraction.



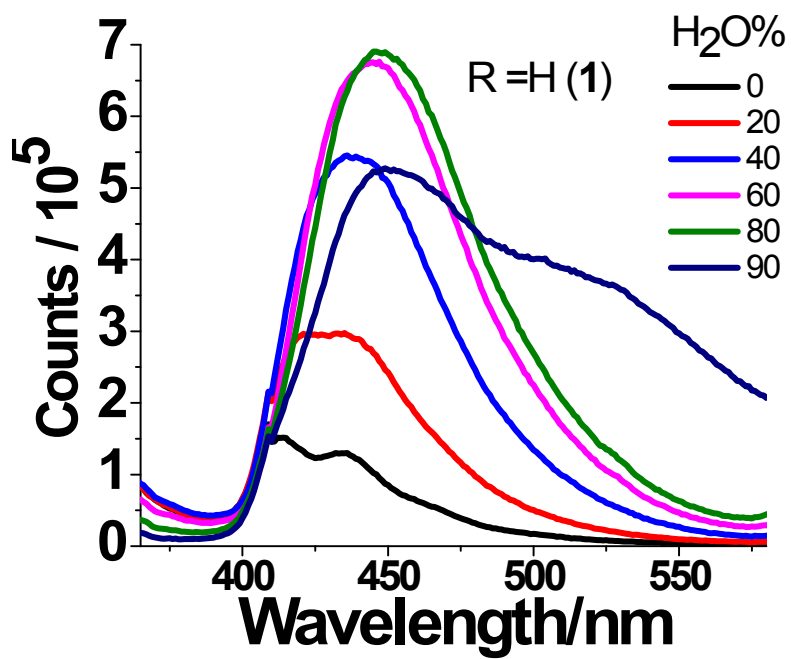

**Figure S4.** PL spectra of pyrenyl-containing carbohydrozone derivative **1** in DMF/H<sub>2</sub>O mixtures with different volume fractions of H<sub>2</sub>O. For the compound **2** and **3**, see main text.

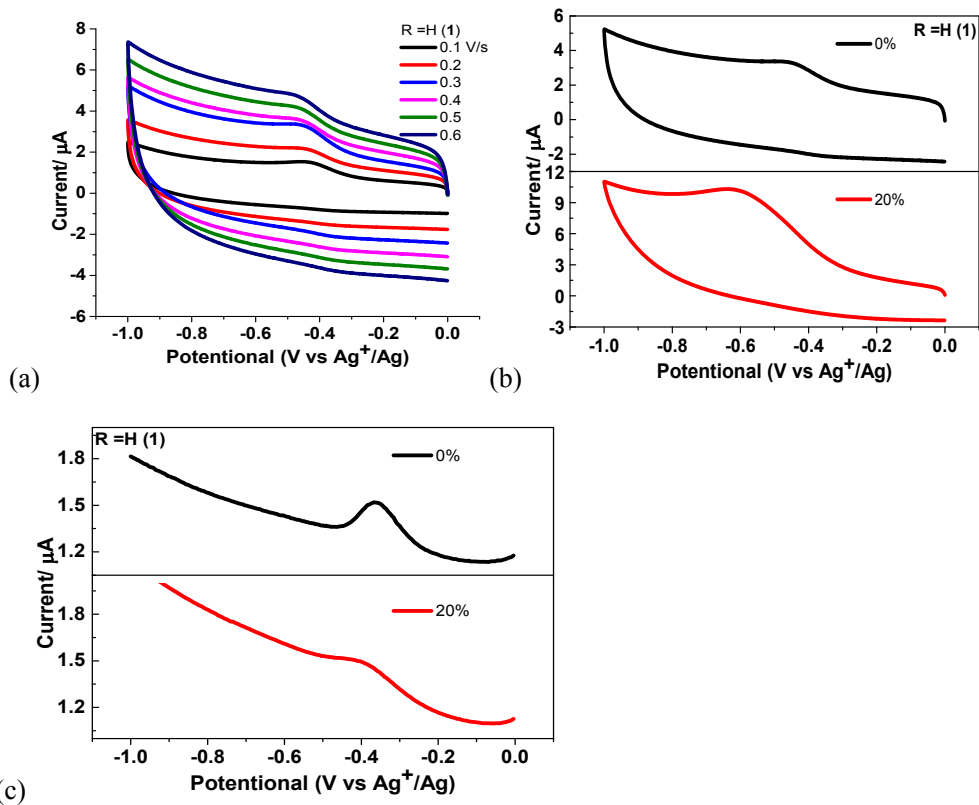

**Figure S5.** Scan-rate dependent cyclic voltammogram of complex **1** ( $10^{-5} \text{ mol L}^{-1}$ ) in DMF/0.05 mM  $\text{NBu}_4\text{PF}_6$  referenced against  $\text{Ag}^+/\text{Ag}$  (a), comparison between CV of complex **1** ( $10^{-5} \text{ mol L}^{-1}$ ) in DMF (black) and aqueous DMF (20% water fraction) at a scan rate of  $300 \text{ mV s}^{-1}$  (b) and DPV (c) in the different media.

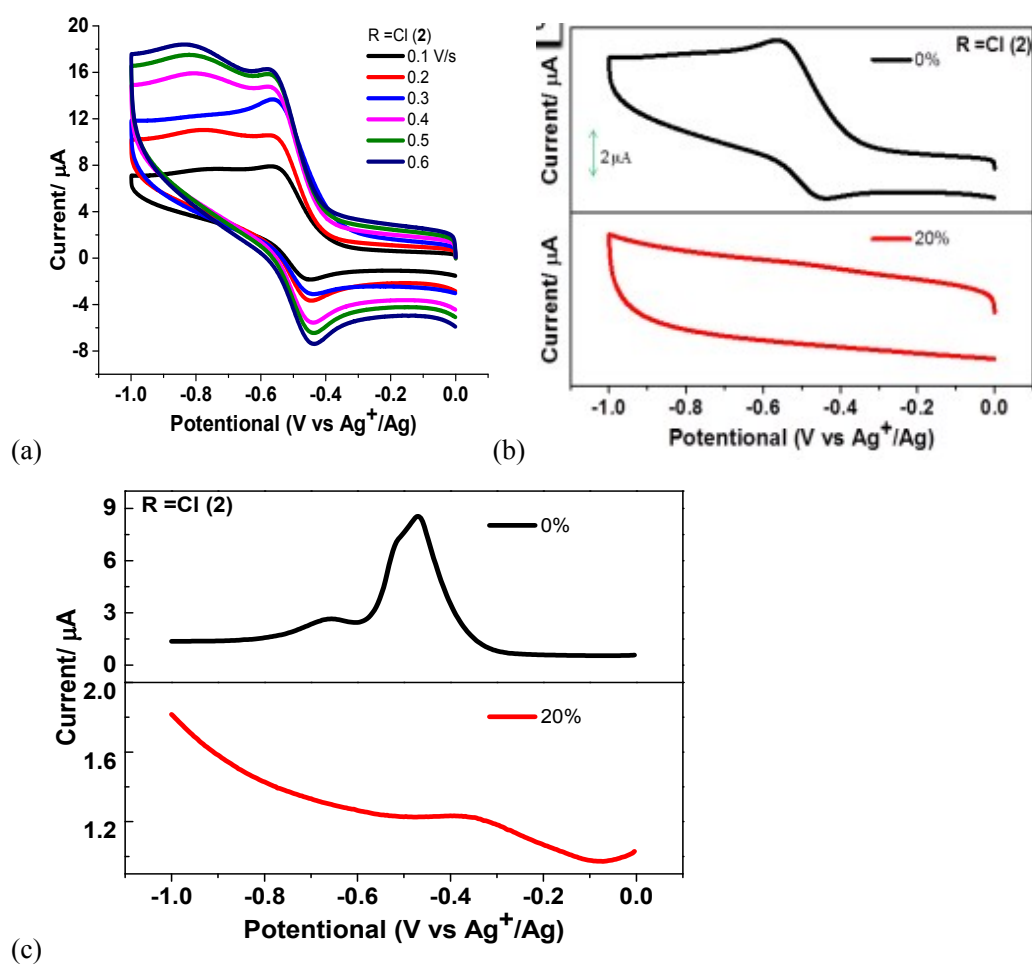

**Figure S6.** Scan-rate dependent cyclic voltammogram of complex 2 ( $10^{-5} \text{ mol L}^{-1}$ ) in DMF/0.05 mM  $\text{NBu}_4\text{PF}_6$  referenced against  $\text{Ag}^+/\text{Ag}$ , comparison between CV of complex 2 ( $10^{-5} \text{ mol L}^{-1}$ ) in DMF (black) and aqueous DMF (20% water fraction) at a scan rate of  $300 \text{ mV s}^{-1}$  (b).

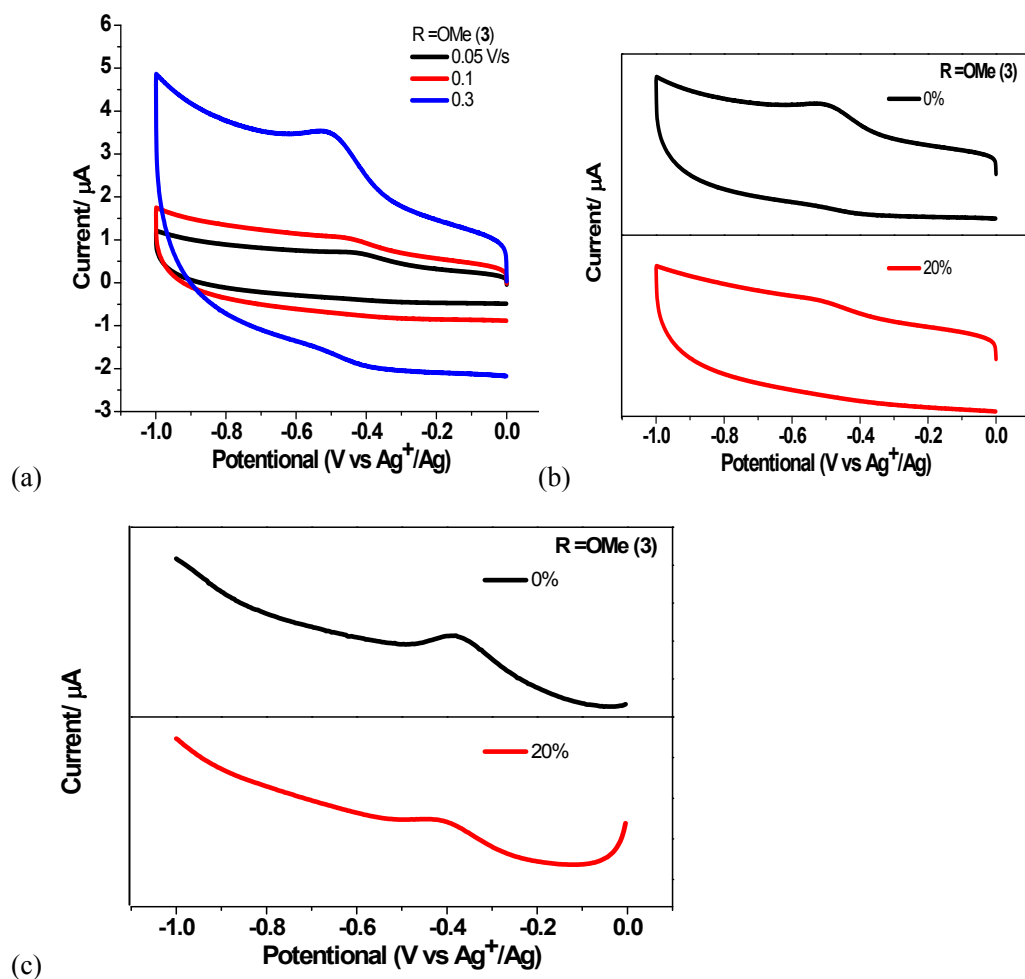

**Figure S7.** Scan-rate dependent cyclic voltammogram of complex **3** ( $10^{-5}$  mol L $^{-1}$ ) in DMF/0.05 mM NBu $_4$ PF $_6$  referenced against Ag $^+$ /Ag (a), comparison between CV of complex **6** ( $10^{-5}$  mol L $^{-1}$ ) in DMF (black) and aqueous DMF (20% water fraction) at a scan rate of 300 mV s $^{-1}$  (b) and DPV (c) in the different media.

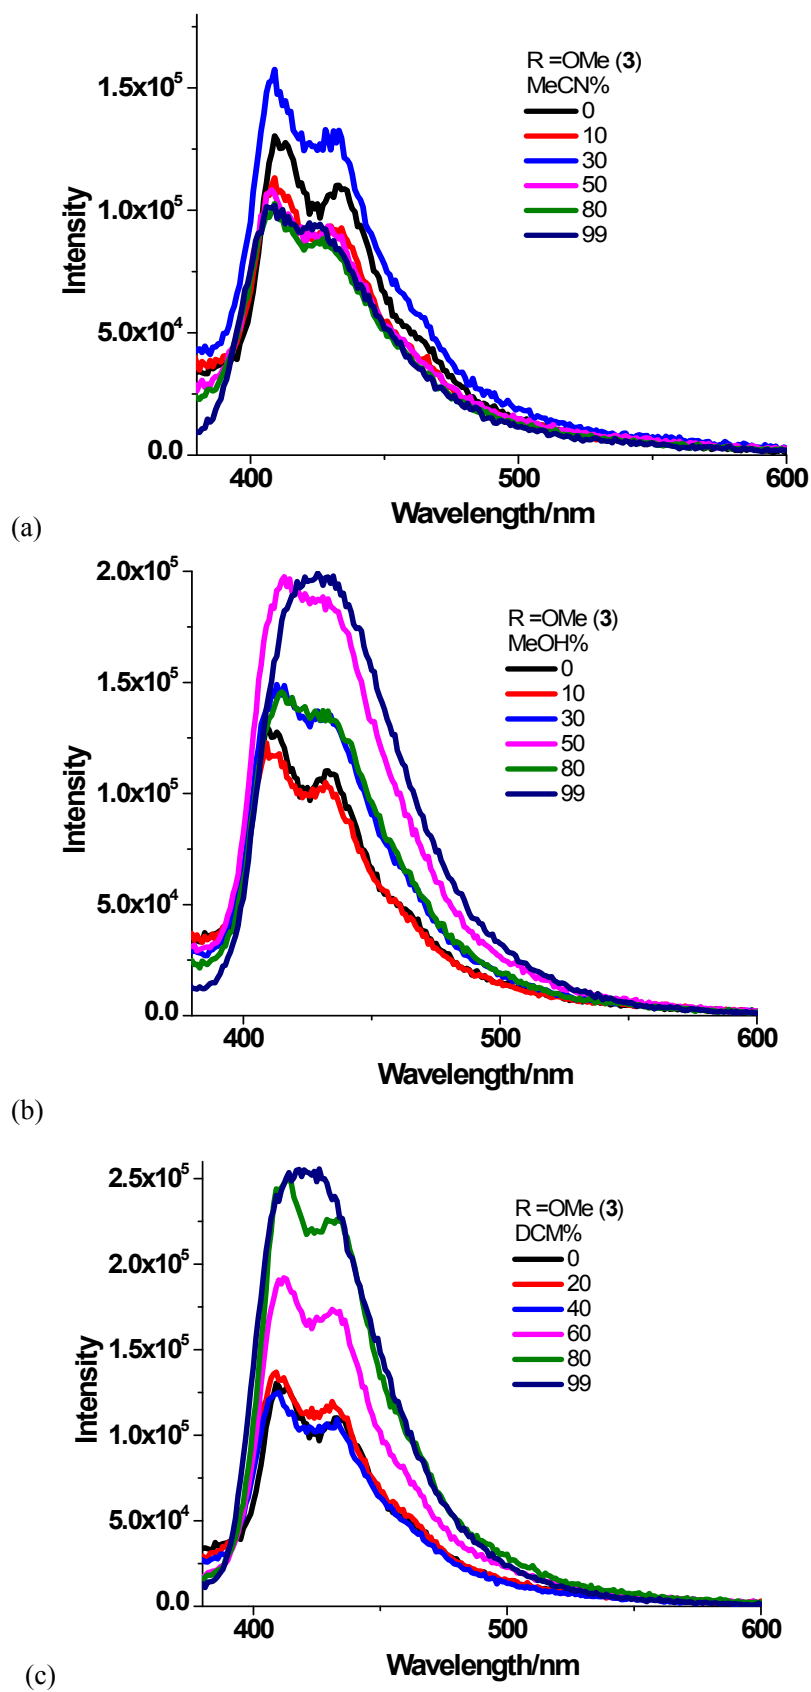

**Figure S8.** PL spectra of **3** in DMF/MeCN (A), DMF/MeOH (B) and DMF/CH<sub>2</sub>Cl<sub>2</sub> mixtures with different volume fractions of cosolvent.  $\lambda_{\text{ex}} = 365 \text{ nm}$ ,  $C = 10 \text{ } \mu\text{M}$ .



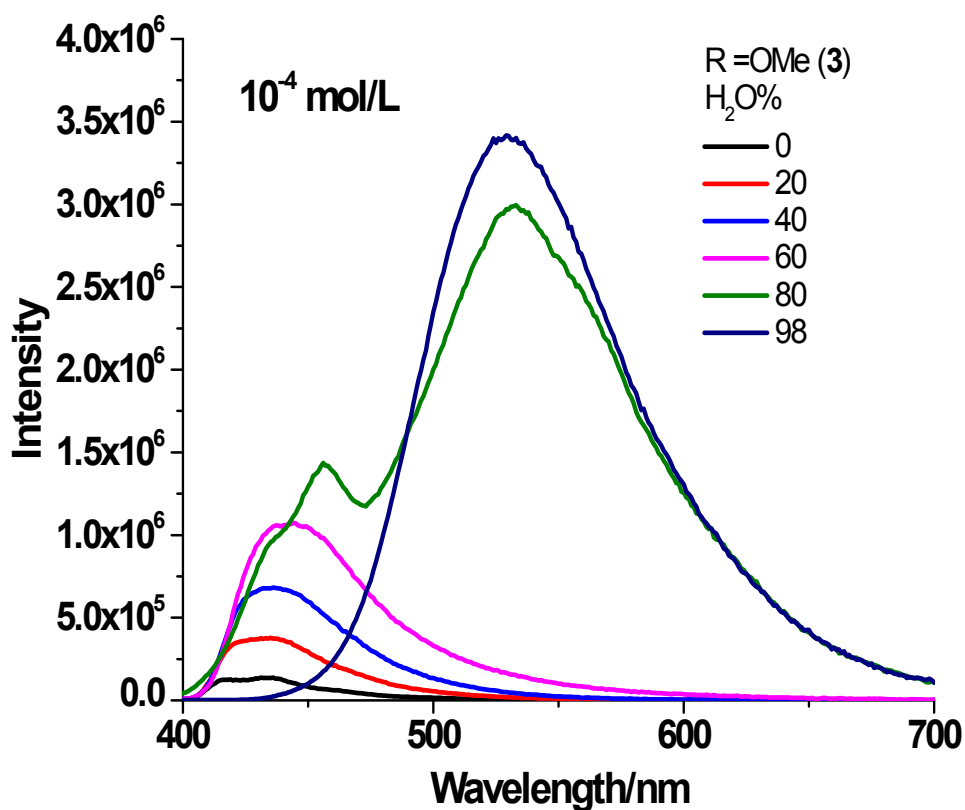

(A)

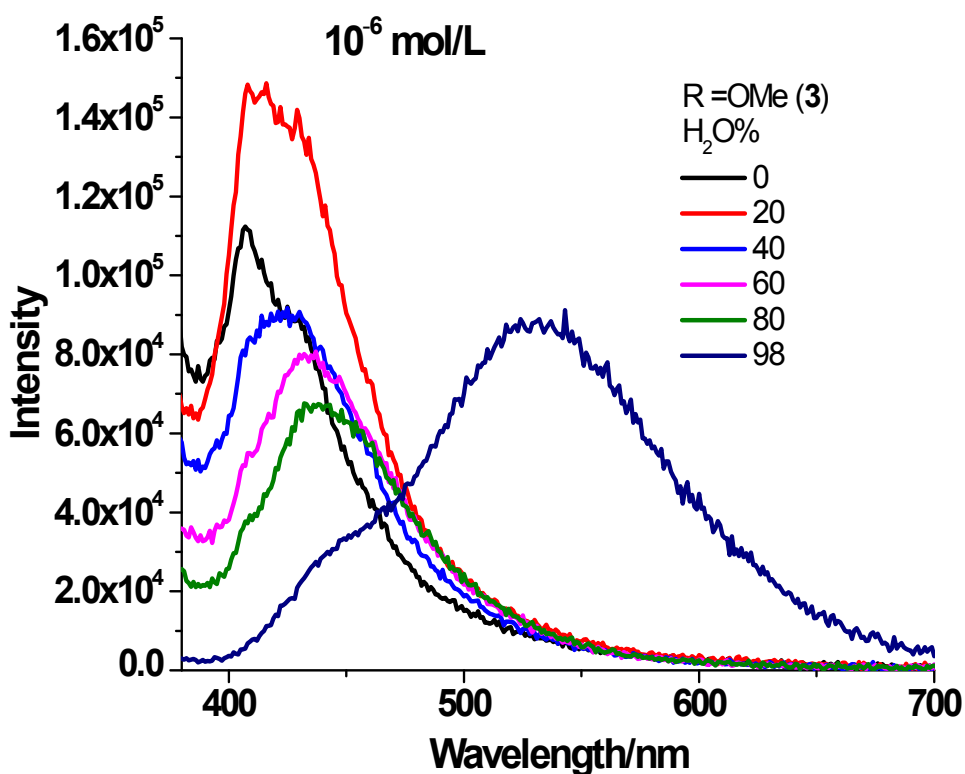

(B)

**Figure S9.** PL spectra of **3** in DMF/H<sub>2</sub>O mixtures with different volume water fractions.  $\lambda_{\text{ex}} = 365$  nm,  $C = 100 \mu\text{M}$  (A) and  $C = 1 \mu\text{M}$  (B).

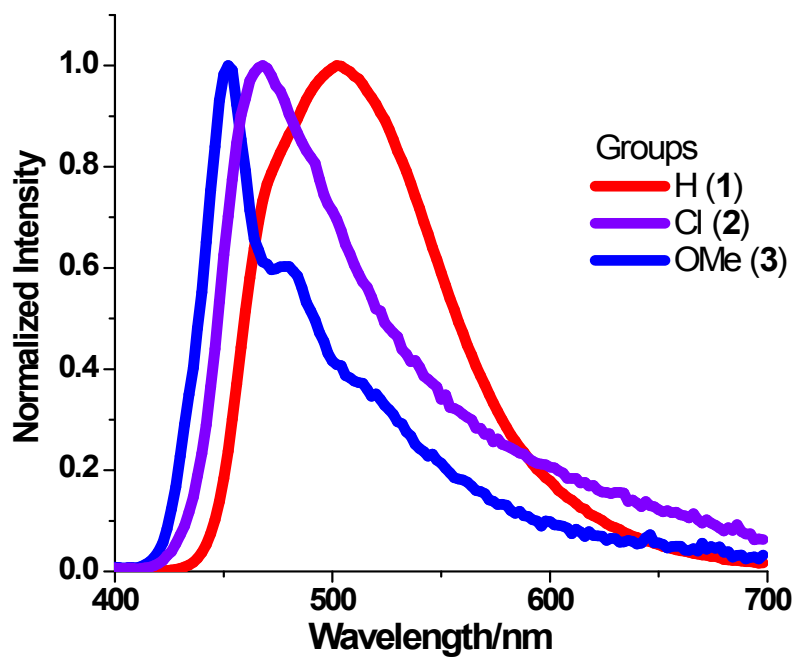

Figure S10. PL spectra of **1-3** in solid state,  $\lambda_{\text{ex}} = 365$  nm.

---



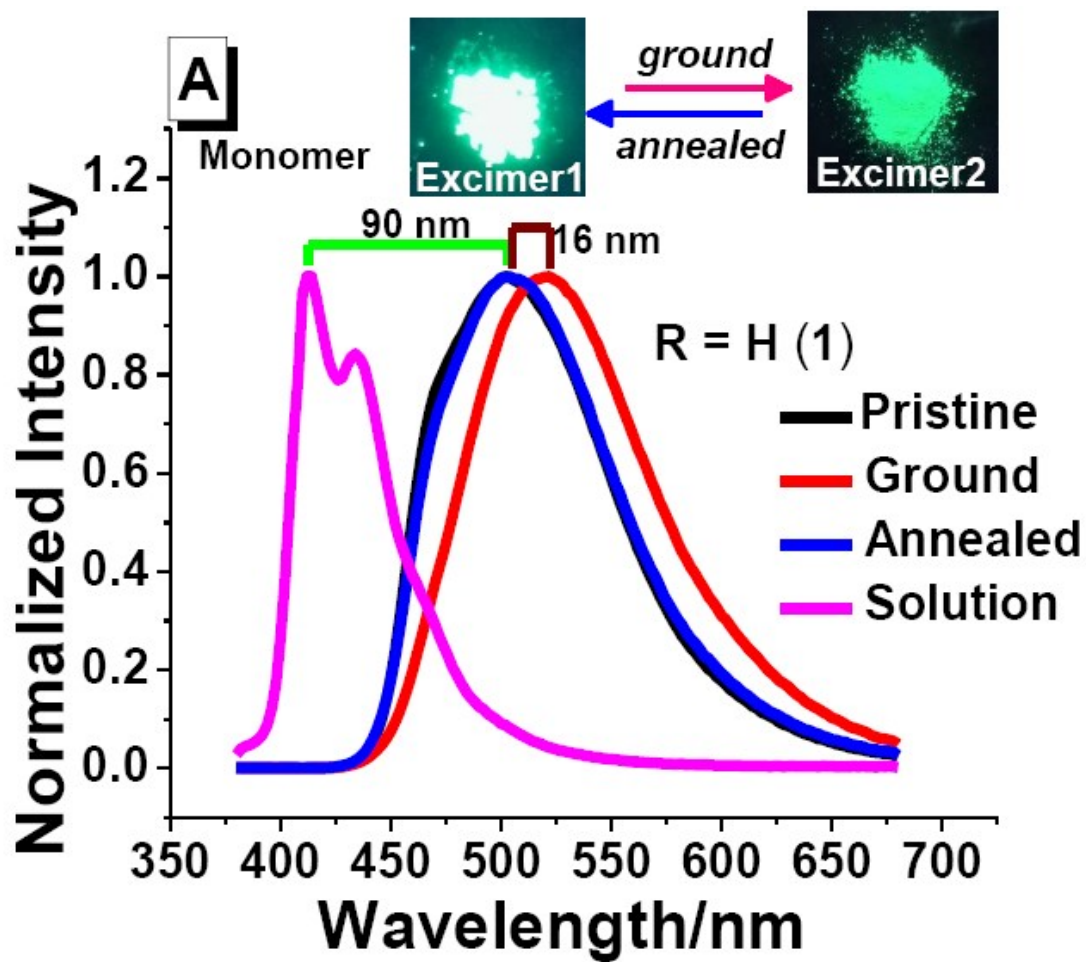

**Figure. S11** Multistate emission spectra of compound **1** in diluted solution, pristine, ground and annealed solids and the photographs taken under 365 nm UV illumination

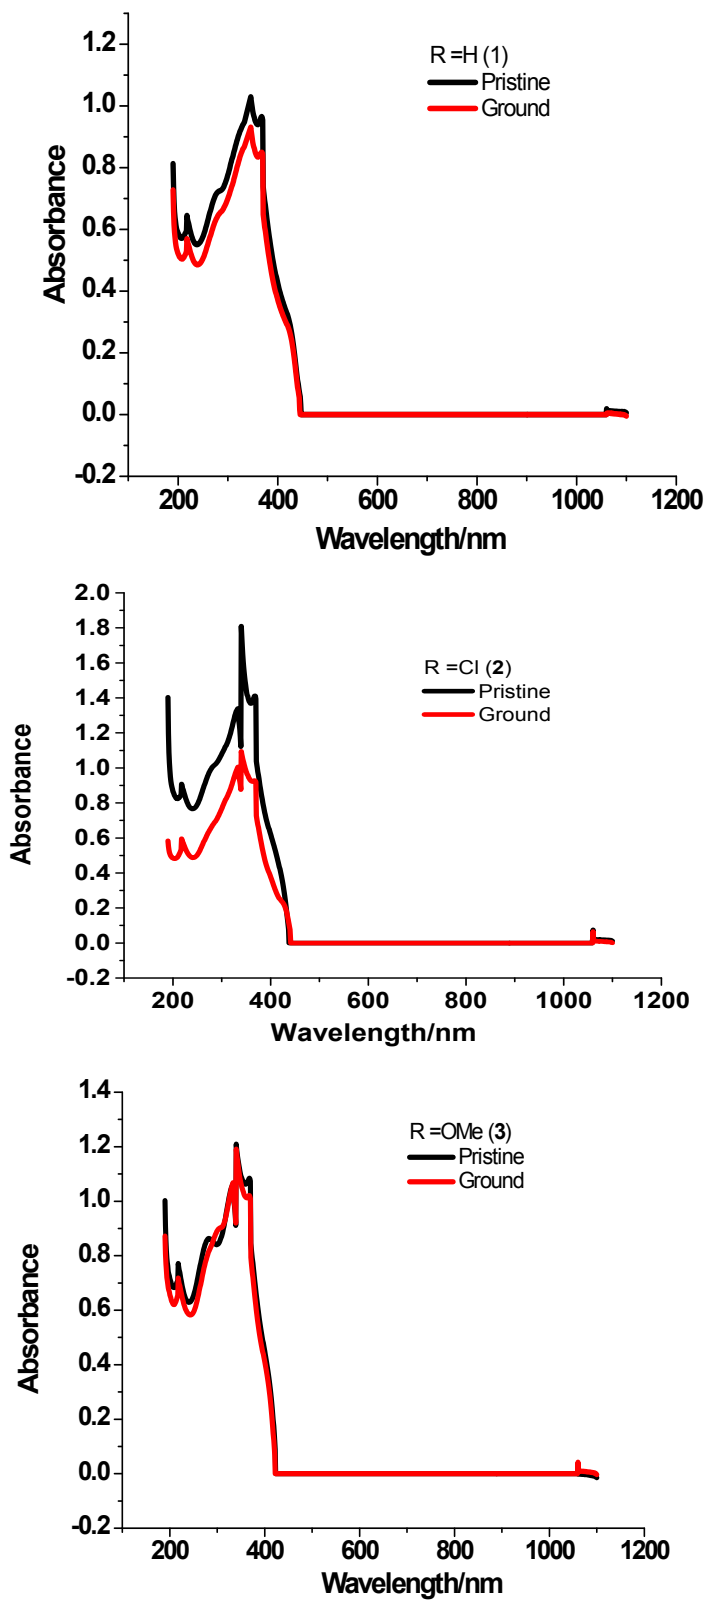

Figure S12. UV-vis spectra of pyrenyl-containing carbohydrozone derivatives in solid state.

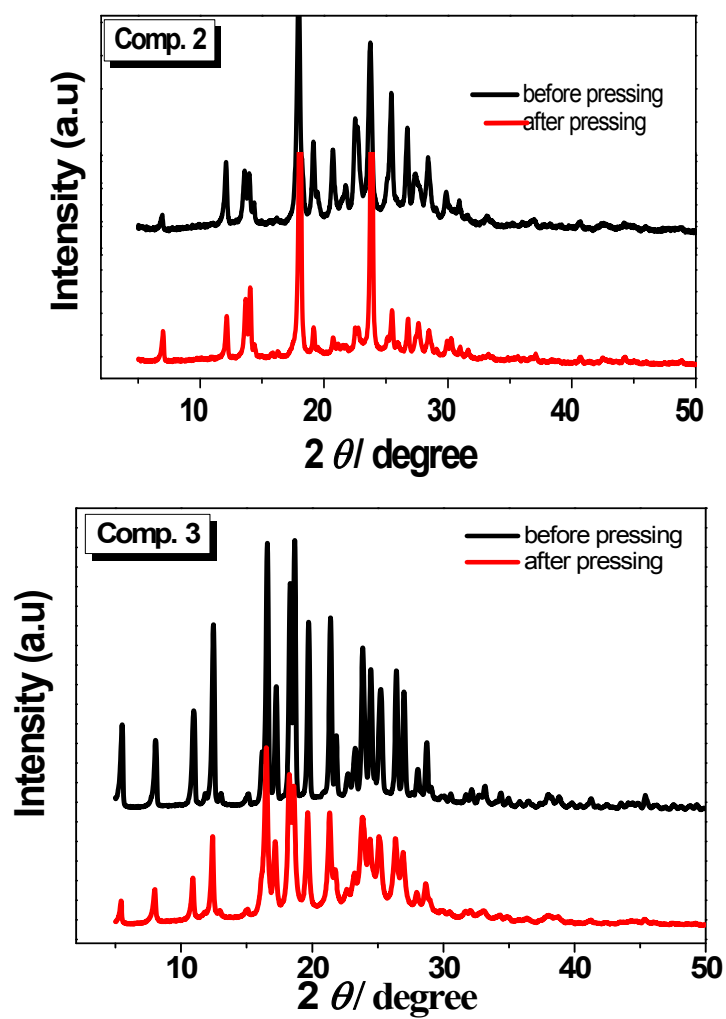

Figure S13. Powder XRD pattern of compound 2 and 3 before(black) and after grinding(red).

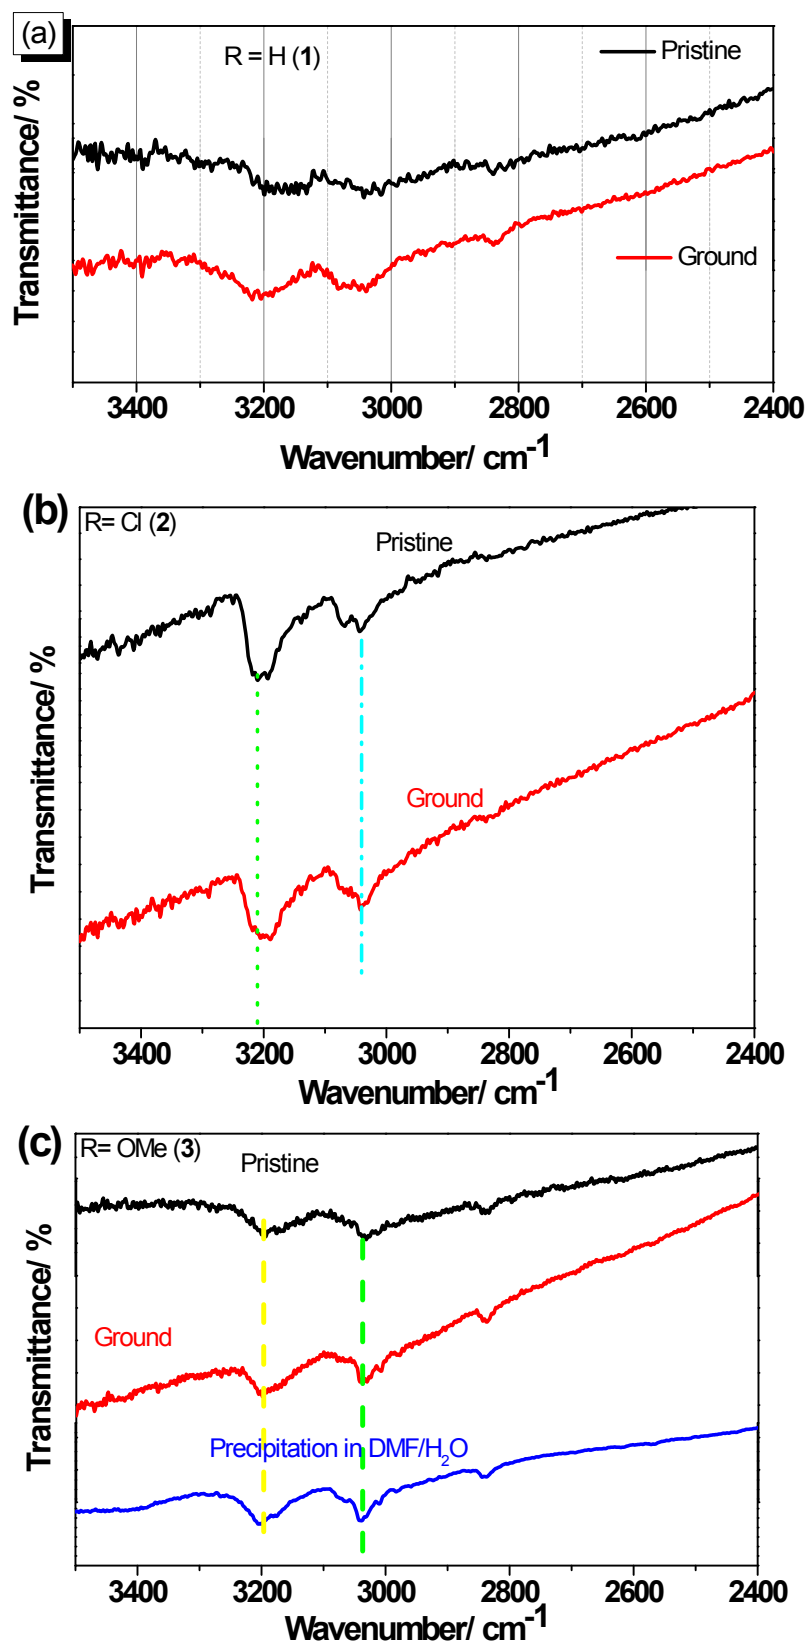

Figure S14. FT-IR spectra of compound 1-3 before(black) and after grinding(red).

Reference:

- 1 D. Wu, X. Zhang, P. Huang, W. Huang, M. Ruan, Z. W. Ouyang *Inorg. Chem.* 2013, **52**, 10976.
- 2 Bruker. SAINT v8.34A. Bruker AXS Inc. 2013 , Madison, Wisconsin, USA.
- 3 Bruker. APEX2 v2014.5-0. Bruker AXS Inc., 2007 , Madison, Wisconsin, USA.
- 4 G. M. Sheldrick, *Acta Cryst.*, 2008, **64**, 112-122.
- 5 Bruker SADABS, Bruker AXS Inc. 2014 , Madison, Wisconsin, USA.
- 6 SHELXTL V5.1, Software Reference Manual; Bruker, AXS, Inc.: Madison, WI, 1997 .
- 7 A. L. Spek, *J. Appl. Crystallogr.*, 2003 , **36**, 7-13.
